# Supplementary material for: A Surface Plasmon Resonance Plastic Optical Fiber Biosensor for the Detection of Pancreatic Amylase in Surgically-Placed Drain Effluent
Source: MDPI journal article supplement (doi:10.3390/s21103443), 2021-05-15
Supplement: s1 [file s1]

## Supporting Information

### A Surface Plasmon Resonance Plastic Optical Fiber Biosensor for the Detection of Pancreatic Amylase in Postoperative Fluids.

Authors: Laura Pasquardini<sup>1</sup>, Nunzio Cennamo<sup>2</sup>, Giuseppe Malleo<sup>3</sup>, Lia Vanzetti<sup>4</sup>, Luigi Zeni<sup>2</sup>, Deborah Bonamini<sup>3</sup>, Roberto Salvia<sup>3</sup>, Claudio Bassi<sup>3</sup>, Alessandra Maria Bossi<sup>5\*</sup>

<sup>1</sup> Indivenire srl, Via Alla Cascata 56/C, 38123 Trento, Italy;

<sup>2</sup> Department of Engineering, University of Campania “L. Vanvitelli”, Via Roma 29, Aversa, Italy;

<sup>3</sup> Department of Surgery, Dentistry, Gynecology and Pediatrics (DSCOMI), University of Verona; Unit of Pancreatic Surgery, University of Verona Hospital Trust, P.Le Scuro 10, 37134 Verona, Italy

<sup>4</sup> Fondazione Bruno Kessler-SD-MNF, Via Sommarive 18, 38123 Povo-Trento, Italy

<sup>5</sup> Department of Biotechnology, University of Verona, Cà Vignal 1, Strada Le Grazie 15, 37134 Verona, Italy

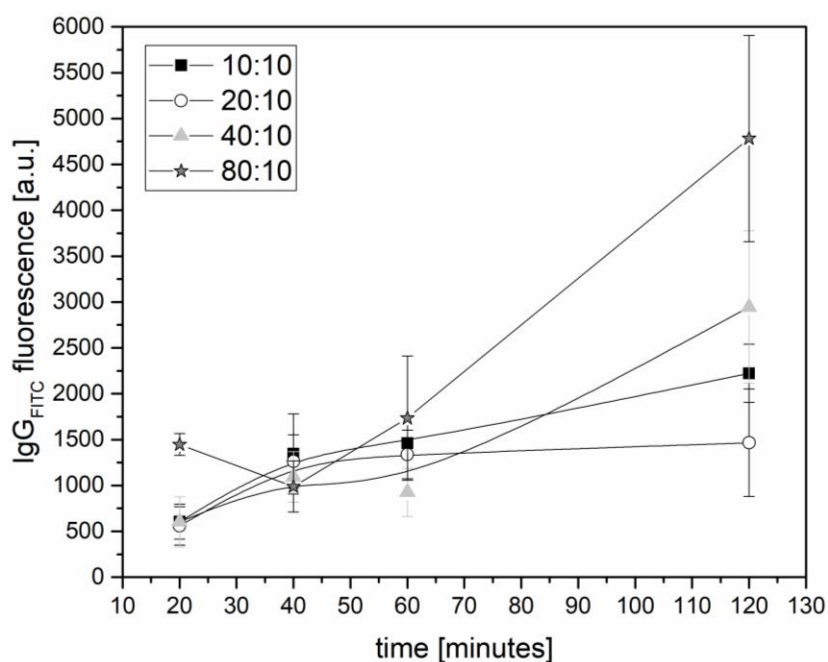

Figure S 1: IgG<sub>FITC</sub> fluorescence on gold substrates functionalized with  $\alpha$ -lipoic acid and different molar ratio (mM) of EDC:sulfoNHS as a function of time. Data are reported as mean value of five images acquired on the samples and error bars represent standard deviation.

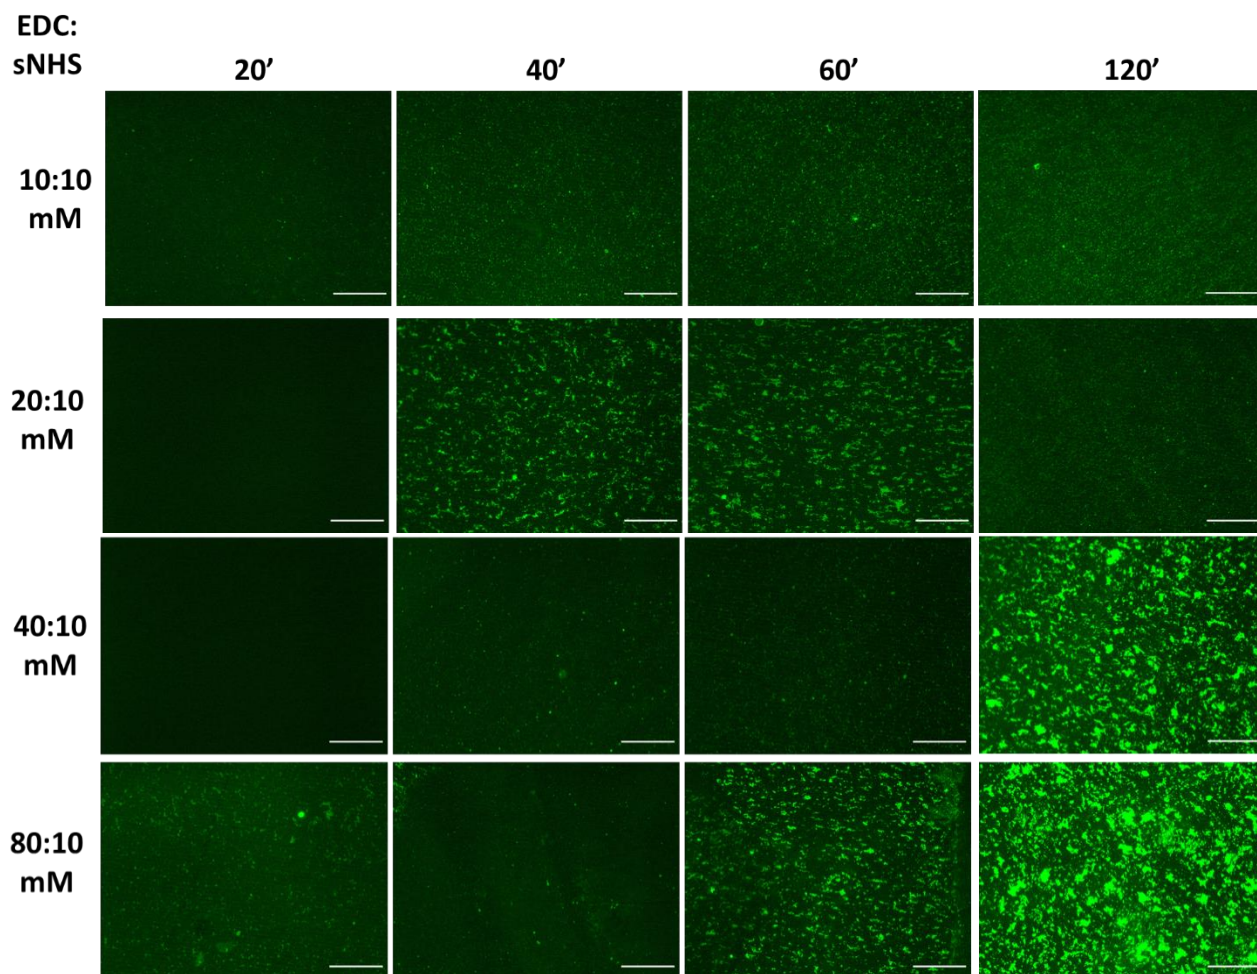

Figure S2: Fluorescence images of IgG<sub>FITC</sub> antibody incubated at 5  $\mu$ g/sample for different times (20 ÷ 120 minutes) on samples with different EDC:sulfoNHS molar ratio and acquired at 20X magnification objective. Scale bar is 100  $\mu$ m.

Table S1: Fitting parameters of the Langmuir curves  $y=A*x/(B+x)$  reported in Figure 2.

| Time [minutes] | A       | B     | Correlation coeff. |
|----------------|---------|-------|--------------------|
| 20             | 2738.31 | 29.92 | 0.95               |
| 40             | 2180.53 | 6.64  | 0.98               |
| 60             | 2831.44 | 5.65  | 0.94               |
| 120            | 3204.55 | 5.76  | 0.99               |

Table S2: XPS characterization at 60° take-off angles on bare gold surface (Au), after  $\alpha$ -lipoic acid coating (Au+SAM) and after antibody immobilization (Au+SAM+IgG<sub>AMY</sub>). XPS standard error does not exceed the 1–2% of the reported value.

|                                 | O 1s (%) | N 1s (%) | C 1s (%) | S 2p (%) | Au 4f (%) |
|---------------------------------|----------|----------|----------|----------|-----------|
| <b>Au</b>                       | 15.3     | -        | 32.1     | -        | 52.6      |
| <b>Au+SAM</b>                   | 12.2     | -        | 51.5     | 3.3      | 32.0      |
| <b>Au+SAM+IgG<sub>AMY</sub></b> | 18.3     | 7.8      | 57.5     | 2.0      | 14.3      |

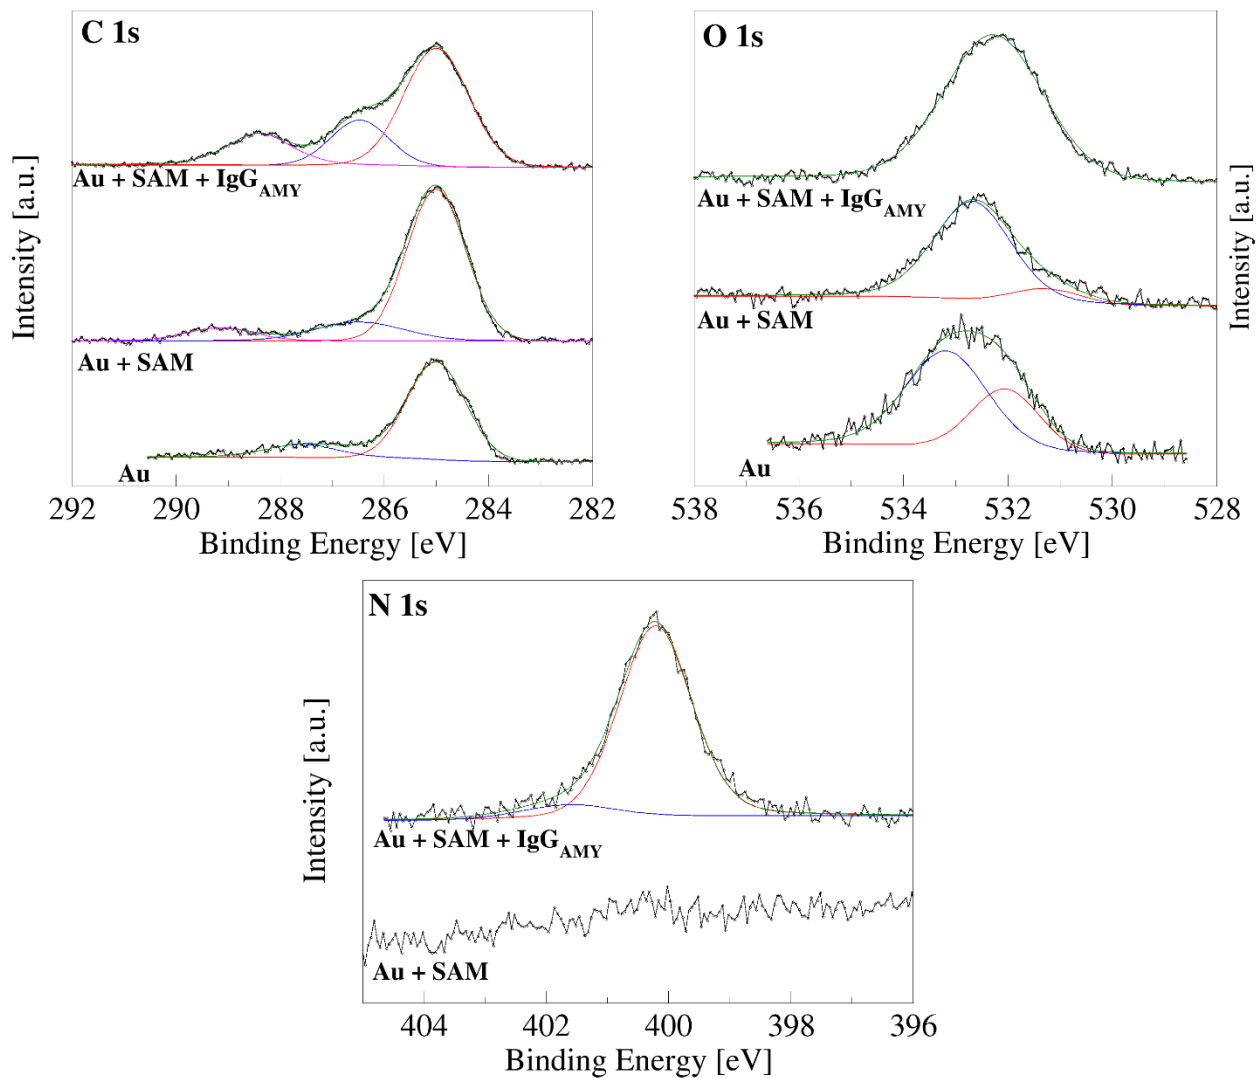

Figure S3: Main core line levels of different samples reported in Table S2 at 60° take-off angle.

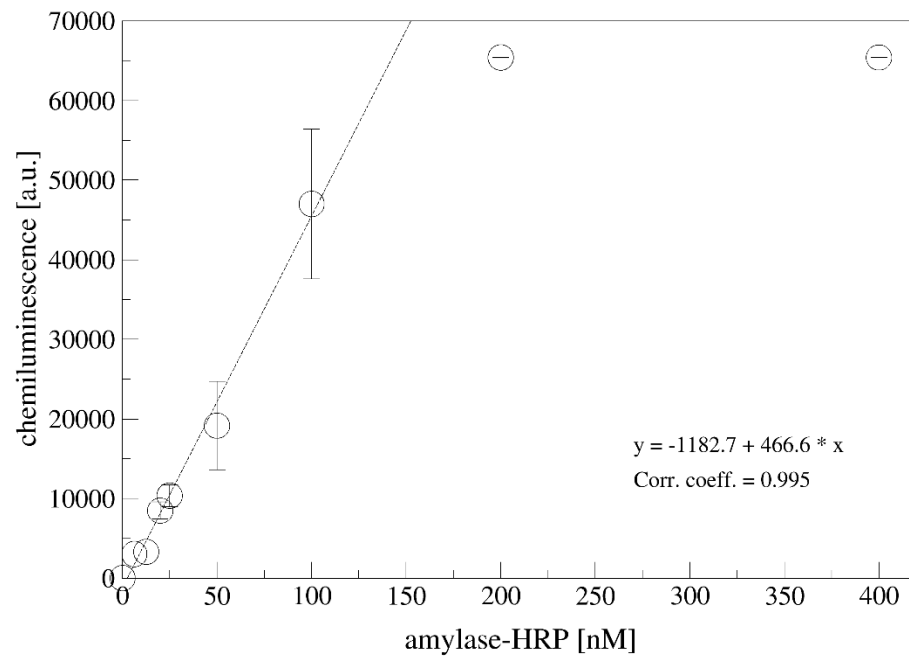

Figure S4: HRP-amylase calibration curve. Data are reported as mean value of four experiments and error bars represent standard deviation.
